# Supplementary material
Source: Springer Nature journal article supplement (https://www.springermedizin.de/resource/supplementary/12887_2007_191_MOESM10_ESM.pdf/9477470)
Supplement: MOESM10 [file 9477470]

Search results:

163

112 articles excluded by  
titles and abstracts

Full texts retrieved for  
further assessment:

51

26 articles excluded; reasons:

- 9 not randomized
- 12 no PT intervention, or PT as an adjunct only in one arm
- 1 non-CP population
- 3 language (Chinese, Italian, Portuguese)
- 1 only within-group outcomes

25 included articles  
22 included studies
